# Supplementary material for: Epidemic surveillance in a low resource setting: lessons from an evaluation of the Solomon Islands syndromic surveillance system, 2017
Source: Springer Nature journal article supplement (doi:10.1186/s12889-018-6295-7), 2018-12-01
Supplement: MOESM3 [file 16355914]

# SI-SSS Evaluation - MHMS staff key informant interview data collection tool

## a) Administrative data

---

1. Date

Example: 15 December 2012

2. Location/facility name

\_\_\_\_\_

3. Respondent

\_\_\_\_\_

4. Informed consent received

Mark only one oval.

Yes

No

5. Informed consent reference number

\_\_\_\_\_

6. Permission to record the interview?

If no, conduct interview and record data in detailed notes

Mark only one oval.

Yes

No

## b) Interview questions

---

7. What is your primary role in the Solomon Islands health system?

Mark only one oval.

Clinical nurse

Clinical doctor

SI-SSS manger / administrator

MHMS manager

No role within the SI health system but a stakeholder in its function

Other: \_\_\_\_\_

**8. What role do you play in the SI-SSS?**

*Mark only one oval.*

- Collect and report data
- Conduct analysis and produce information
- Manager the day-to-day operation of the system
- Receive and use information generated by the system
- Provide technical and/or financial supporter
- Interested party on the periphery of the SI-SSS but do not play a role in it
- Other: \_\_\_\_\_

**9. How long have you been involved in the SI-SSS?**

*Mark only one oval.*

- <1 yr
- 1-3 yrs
- >3 yrs

**10. What do you see as the key strengths of the SI-SSS?**

\_\_\_\_\_

**11. What are the SI-SSS's weaknesses?**

\_\_\_\_\_

**12. What do you understand to be the purpose (aims or objectives) of the SI-SSS?**

\_\_\_\_\_

**13. In your view, how well is the SI-SSS meeting this/these purpose/s?**

*Mark only one oval.*

1      2      3      4      5

Not well at all                  Very well

**14. What factors do you see affecting, either positively or negatively, the SI-SSS's ability to meet this/these purpose/s?**

\_\_\_\_\_

**15. Thinking back, what events, activities or initiatives have lead to a noticeable improvement in the SI-SSS's function?**

\_\_\_\_\_

**16. [For surveillance nurses only] Talk me through the process of collecting and reporting surveillance data.**

\_\_\_\_\_

17. **[For surveillance nurses only] Are there aspects of this process that could be streamlined or simplified? What would be required for this to happen?**

---

18. **[For surveillance nurses only] Are there written procedures available to guide the data collection and reporting process? If so, how useful are they?**

---

19. **[For surveillance nurses only] Please provide comment on the usability of the surveillance case definitions, that is, how easy they are to understand and apply? Do you have any difficulties using them?**

---

20. **[For system managers only] How well integrated is the SI-SSS with other health data collection and information systems in Solomon Islands?**

---

21. **[For system managers only] Do you feel the case definitions used in the SI-SSS are appropriate (ie, easily understood and applied, sensitive enough, appropriate for the disease profile)?**

---

22. **[For system managers only] The SI-SSS has an event-based surveillance component. How is event-based surveillance implemented in Solomon Islands? How would you describe its functionality?**

---

23. **Can you provide examples of how the SI-SSS is contributing to health protection in Solomon Islands?**

---

**24. Which of the following statements aligns best with your views?**

*Mark only one oval.*

- The SI-SSS is able to detect the vast majority of outbreaks, big and small.
- The SI-SSS is good at picking up big outbreaks but not so good at picking up small ones.
- It is unclear to me if the SI-SSS is able to pick up outbreak.
- None of these statements reflect my view. My view is better expressed as... [record in 'other']
- Other: \_\_\_\_\_

**25. Thinking about the timeliness of data flow through the SI-SSS, are there points in the system where unacceptable delays occur? If so, at what stages?**

*Tick all that apply.*

- Data collection
- Reporting from surveillance sites to MHMS
- Data analysis and information generation
- Notifying management of surveillance signals / concern
- Responding to signals
- Other: \_\_\_\_\_

**26. What are the causes of these delays and what could be done to address them?**

\_\_\_\_\_

**27. [For system managers only] Talk me through what happens when a surveillance signal is generated?**

\_\_\_\_\_

**28. [For system managers only] Typically, what works well when responding to a surveillance signal? And what doesn't?**

\_\_\_\_\_

**29. [For system managers only] How confident are you in the accuracy of SI-SSS-generated signals?**

\_\_\_\_\_

**30. [For system managers only] What contribution do other source of health data (e.g., laboratory reporting; hospital-based reporting) make to outbreak detection in Solomon Islands?**

\_\_\_\_\_

## **c) Conclusion**

---

31. In general, how satisfied are you with the SI-SSS's performance?

*Mark only one oval.*

|          |                       |                       |                       |                       |                       |      |
|----------|-----------------------|-----------------------|-----------------------|-----------------------|-----------------------|------|
|          | 1                     | 2                     | 3                     | 4                     | 5                     |      |
| Not very | <input type="radio"/> | <input type="radio"/> | <input type="radio"/> | <input type="radio"/> | <input type="radio"/> | Very |

---

32. Is there anything else that you would like to add?

---

33. Would you like to receive a copy of the results of this research?

*Mark only one oval.*

- Yes  
 No
-
