# Supplementary material for: Epidemic surveillance in a low resource setting: lessons from an evaluation of the Solomon Islands syndromic surveillance system, 2017
Source: Springer Nature journal article supplement (doi:10.1186/s12889-018-6295-7), 2018-12-01
Supplement: MOESM4 [file 16355914]

| Parameter                                                                   | Syndrome               | Median | Inter-quartile range |        |
|-----------------------------------------------------------------------------|------------------------|--------|----------------------|--------|
|                                                                             |                        |        | Lower                | Upper  |
| <b>Magnitude of additional case presentations</b>                           |                        |        |                      |        |
| Small                                                                       | Acute fever and rash   | 6.50%  | 3.50%                | 17.84% |
|                                                                             | Dengue-like illness    | 15.00% | 9.84%                | 42.84% |
|                                                                             | Diarrhoea              | 21.83% | 13.00%               | 27.50% |
|                                                                             | Influenza-like illness | 7.00%  | 3.84%                | 11.50% |
| Moderate                                                                    | Acute fever and rash   | 7.67%  | 2.83%                | 19.50% |
|                                                                             | Dengue-like illness    | 20.84% | 11.83%               | 54.50% |
|                                                                             | Diarrhoea              | 36.50% | 31.00%               | 49.00% |
|                                                                             | Influenza-like illness | 15.50% | 8.67%                | 30.34% |
| Large                                                                       | Acute fever and rash   | 9.67%  | 4.34%                | 19.50% |
|                                                                             | Dengue-like illness    | 21.84% | 14.67%               | 58.17% |
|                                                                             | Diarrhoea              | 49.67% | 41.33%               | 63.50% |
|                                                                             | Influenza-like illness | 28.17% | 17.67%               | 49.50% |
| Very large                                                                  | Acute fever and rash   | 11.00% | 4.83%                | 20.33% |
|                                                                             | Dengue-like illness    | 22.84% | 14.67%               | 61.33% |
|                                                                             | Diarrhoea              | 62.17% | 50.17%               | 73.84% |
|                                                                             | Influenza-like illness | 41.34% | 26.17%               | 60.50% |
| <b>Duration and temporal distribution of additional cases presentations</b> |                        |        |                      |        |
| Single peak event with all cases presenting in 1 reporting period           | Acute fever and rash   | 15.67% | 3.67%                | 26.67% |
|                                                                             | Dengue-like illness    | 24.33% | 15.83%               | 52.50% |
|                                                                             | Diarrhoea              | 35.34% | 20.50%               | 46.67% |
|                                                                             | Influenza-like illness | 12.17% | 6.67%                | 25.84% |
| Single peak event with additional cases presenting over 2 reporting periods | Acute fever and rash   | 11.17% | 3.50%                | 22.34% |
|                                                                             | Dengue-like illness    | 19.17% | 13.00%               | 46.33% |
|                                                                             | Diarrhoea              | 30.50% | 19.67%               | 38.67% |
|                                                                             | Influenza-like illness | 10.67% | 6.33%                | 21.00% |
| Multi-peak event with additional cases presenting over 3 reporting periods  | Acute fever and rash   | 12.00% | 4.17%                | 24.00% |
|                                                                             | Dengue-like illness    | 19.67% | 11.84%               | 47.34% |
|                                                                             | Diarrhoea              | 28.00% | 19.33%               | 37.83% |
|                                                                             | Influenza-like illness | 8.17%  | 4.00%                | 20.17% |
| Prolonged event over 4 reporting periods                                    | Acute fever and rash   | 9.33%  | 3.00%                | 19.67% |
|                                                                             | Dengue-like illness    | 17.33% | 12.17%               | 44.00% |
|                                                                             | Diarrhoea              | 27.17% | 18.50%               | 35.50% |
|                                                                             | Influenza-like illness | 7.50%  | 4.00%                | 18.84% |
| <b>False alert rate</b>                                                     |                        |        |                      |        |
|                                                                             | Acute fever and rash   | 4.50%  | 1.50%                | 9.34%  |
|                                                                             | Dengue-like illness    | 14.50% | 8.84%                | 22.00% |
|                                                                             | Diarrhoea              | 27.00% | 20.33%               | 30.67% |
|                                                                             | Influenza-like illness | 8.50%  | 4.34%                | 15.00% |
